# Supplementary material for: Growth inhibition associated with disruption of the actin cytoskeleton by Latrunculin A in rhabdomyosarcoma cells
Source: PubMed Central journal article supplement (PMC7478754; doi:10.1371/journal.pone.0238572), 2020-09-08

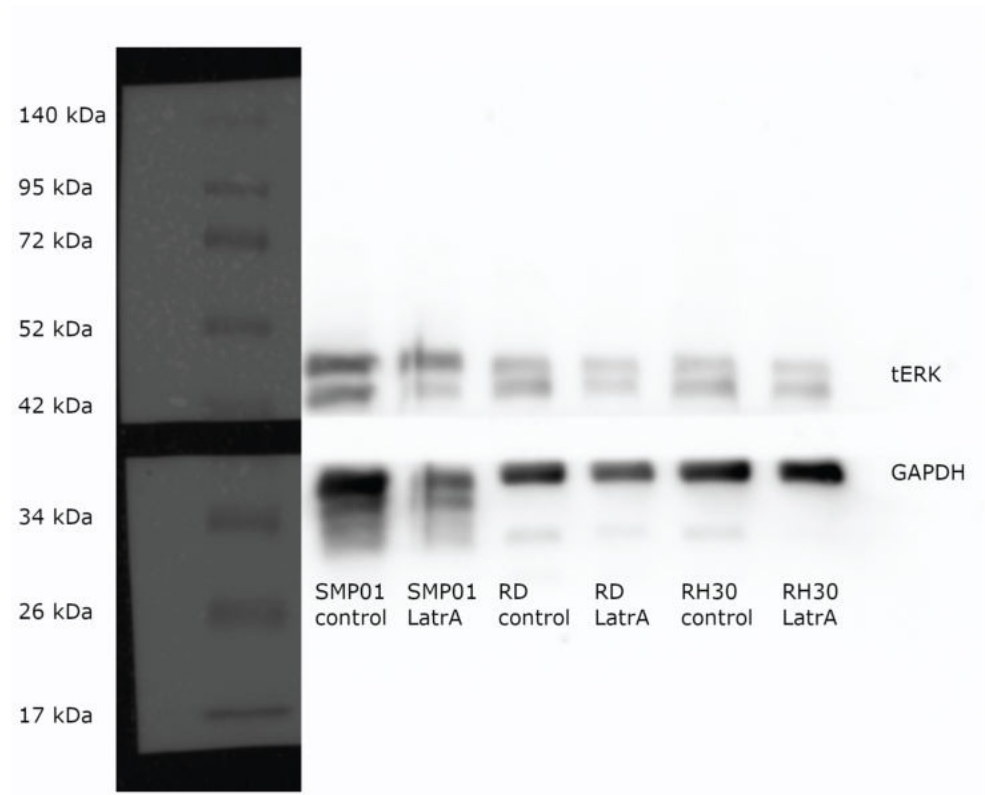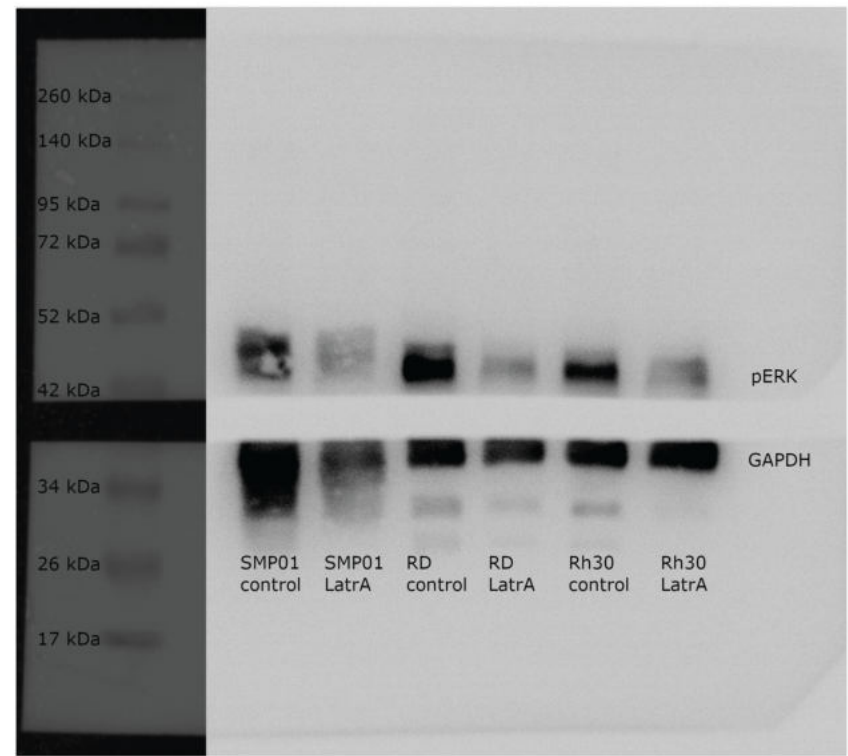

Supplement: pone.0238572.s001.pdf [file pone.0238572.s001.pdf]
